# Supplementary material for: Two weeks of twice-daily prism adaptation treatment does not improve posture or gait in Parkinson’s disease: a double-blind randomized controlled trial
Source: Springer Nature journal article supplement (doi:10.1186/s13063-021-05832-2), 2021-11-25
Supplement: MOESM2 [file 19901046]

*Supplementary Table 1.* Demographic and clinical details of the participants in the real treatment group. M=male; F=female; L=left; R=right; MOCA=Montreal Cognitive Assessment; MDS-UPDRS-III = Motor Disease Society Unified Parkinson's Disease Rating Scale, Part III; H & Y = Hoehn and Yahr Rating Scale; TUG = Timed up and Go; CN = Cranial Nerve; \* = patient with comorbid diagnosis of Progressive Supranuclear Palsy, -= data not available / not tested.

| Participant | Sex | Age (years) | Handedness | Time since diagnosis (years) | Weight (Lbs) | Height (inches) | MOCA (/30) | MDS-UPDRS-III |               |                         |             | H & Y | TUG (s) | Medication [drug name (mg/day)]                                                        | Neurological examination                                                         |
|-------------|-----|-------------|------------|------------------------------|--------------|-----------------|------------|---------------|---------------|-------------------------|-------------|-------|---------|----------------------------------------------------------------------------------------|----------------------------------------------------------------------------------|
|             |     |             |            |                              |              |                 |            | Gait (/4)     | Freezing (/4) | Postural Stability (/4) | Total (132) |       |         |                                                                                        |                                                                                  |
| VA002       | F   | 60          | R          | 0.37                         | 113          | 62              | 29         | 1             | 1             | 0                       | 18          | 2     | 6.6     | rasagiline (1)                                                                         | Normal; CN1 not tested.                                                          |
| VA004       | M   | 76          | R          | 14.97                        | 171          | 70              | 22         | 1             | 1             | 1                       | 43          | 2     | 8.5     | trihexyphenidyl (8), carbidopa (18.8), levodopa (75), pramipexole (3); selegiline (10) | Mild right shoulder weakness (1), hypoactive muscle stretch reflexes bilaterally |
| VA010       | F   | 79          | R          | 2.17                         | 96           | 62              | 20         | 1             | 0             | 2                       | 34          | 3     | 27.0    | carbidopa (125), levodopa (500), pramipexole (0.25)                                    | Mild sensory loss for pin prick sensation in bilateral lower limbs               |
| VA012       | M   | 73          | R          | 4.31                         | 345          | 75              | 17         | 1             | 0             | 1                       | 24          | 1     | 13.7    | carbidopa (150), levodopa (600), pramipexole (3), entacapone (600)                     | Hyperactive muscle stretch reflexes in arms bilaterally                          |
| VA013       | M   | 68          | R          | 10.32                        | 160          | 65              | 28         | 2             | 2             | 1                       | 54          | 3     | 6.8     | entacapone (600), amantadine (200), carbidopa (75), levodopa (300)                     | Normal                                                                           |
| VA015       | M   | 62          | R          | 18.96                        | 221          | 68              | 27         | 1             | 0             | 1                       | 34          | 2.5   | 8.9     | carbidopa (175), levodopa (1450), ropinirole (5), selegiline (10), entacapone (1000)   | CN1 abnormal (could not detect coffee ground)                                    |
| VA017       | F   | 67          | R          | 1.26                         | 144          | 65              | 24         | 1             | 0             | 1                       | 32          | 2     | 13.3    | carbidopa (100); levodopa (400); clonazepam (.5?)                                      | No notes available                                                               |
| VA020       | M   | 78          | R          | 4.67                         | 216          | 71              | 26         | 2             | 1             | 1                       | 31          | 2     | 12.60   | carbidopa (50), levodopa (200); rasagiline (1)                                         | Impaired sense of smell                                                          |
| VA021       | M   | 84          | R          | 3.13                         | 200          | 67              | 20         | 1             | 0             | 1                       | 37          | 2     | 16.2    | carbidopa (25), levodopa (100)                                                         | UPSIT 11/40; mild apgaze palsy; hypoactive R &                                   |

|           |   |            |   |           |              |            |            |           |           |           |            |           |            |                                                                                                         |                                                                                                        |
|-----------|---|------------|---|-----------|--------------|------------|------------|-----------|-----------|-----------|------------|-----------|------------|---------------------------------------------------------------------------------------------------------|--------------------------------------------------------------------------------------------------------|
|           |   |            |   |           |              |            |            |           |           |           |            |           |            |                                                                                                         | L arms & legs                                                                                          |
| VA022     | F | 63         | R | 8.36      | 119          | 63         | -          | 2         | 0         | 2         | 30         | 2         | 14.0       | carbidopa (50), levodopa (200) 1 qhs and 1/2 qam; carbidopa (25); levodopa (80)                         | Poor sense of smell, mild reduction in vibration sense in R & L legs                                   |
| VA024     | M | 58         | R | 10.88     | 134          | 66         | 29         | 1         | 0         | 3         | 26         | 3         | 8.0        | carbidopa levadopa (10-100 qid, 5-200 CR qid);                                                          | Normal                                                                                                 |
| VA025     | F | 73         | R | 9.38      | 155          | 59         | 25         | 2         | 1         | 3         | 37         | 3         | 11.3<br>2  | carbidopa levadopa (100-400), ER (2) at bedtime                                                         | CN I abnormal                                                                                          |
| VA028     | M | 78         | R | 18.07     | 178.5        | 62         | 25         | 1         | 0         | 1         | 35         | 2         | 8.0        | carbidopa/levodopa (25/100 x 2, 5x/day), azilect (), entacapone (1000), carbidopa/levadopa (50-200 qhs) | CN I abnormal, decreased vibration sense in R and L leg, hypoactive reflexes R and L arm, R and L leg) |
| VA029     | M | 69         | R | 3.21      | 155          | 71         | 25         | 2         | 1         | 1         | 55         | 3         | 11.4       | rasagline (0.5), exelon (3), miralax (1700), Vit D (4), Glucosamine/chondroitin (1tab), Vit C (500),    | Normal, CN 1 not tested                                                                                |
| VA030     | M | 65         | R | 4.96      | 140          | 67         | 29         | 1         | 0         | 1         | 33         | 3         | 10.8       | sinemet (25/100, 3x/day), bupropion (150), dulare (10), Vit D (5,000)                                   | Mild ophthalmoparesis in all directions of gaze, could not bury the sclera on horizontal gaze          |
| VA031     | M | 80         | R | 4.33      | 188          | 72         | 24         | 1         | 0         | 0         | 25         | 2.5       | 9.2        | amantadine (100); carbidopa (25); levodopa (100)                                                        | Cannot smell coffee, slight cerebellar tumor (tremor?), decreased vibration in ankles (R and L)        |
| Mean (SD) |   | 70.8 (7.9) |   | 7.5 (5.8) | 171.0 (58.5) | 66.6 (4.4) | 24.7 (0.5) | 1.4 (0.5) | 0.4 (0.6) | 1.3 (0.9) | 34.3 (9.9) | 2.4 (0.6) | 11.6 (5.0) |                                                                                                         |                                                                                                        |

Supplementary Table 2. Demographic and clinical details of the participants in the sham treatment group. M=male; F=female; L=left; R=right; MOCA=Montreal Cognitive Assessment; MDS-UPDRS-III = Motor Disease Society Unified Parkinson's Disease Rating Scale, Part III; H & Y = Hoehn and Yahr Rating Scale; TUG = Timed up and Go; CN = Cranial Nerve; -= data not available / not tested.

| Ppt   | Sex | Age (years) | H'ness | Time since diagnosis (years) | Weight (Lbs) | Height (inches) | MOCA (/30) | MDS-UPDRS-III |               |                         |             | H & Y | TUG (s) | Medication [drug name (mg/day)]                                     | Neurological examination                                                                                                                      |
|-------|-----|-------------|--------|------------------------------|--------------|-----------------|------------|---------------|---------------|-------------------------|-------------|-------|---------|---------------------------------------------------------------------|-----------------------------------------------------------------------------------------------------------------------------------------------|
|       |     |             |        |                              |              |                 |            | Gait (/4)     | Freezing (/4) | Postural Stability (/4) | Total (132) |       |         |                                                                     |                                                                                                                                               |
| VA001 | F   | 65          | R      | 6.25                         | 150          | 63              | 24         | 0             | 0             | 0                       | 36          | 2     | 8.4     | carbidopa (150), levodopa (600), ropinirole (12); rasagiline (1)    | Normal                                                                                                                                        |
| VA005 | F   | 60          | R      | 6.13                         | 186          | 65              | 27         | 1             | 0             | 1                       | 23          | 2.5   | 8.2     | pramipexole (2.25), carbidopa (75), levodopa (300)                  | Normal                                                                                                                                        |
| VA006 | M   | 78          | R      | 12.81                        | 197          | 67              | 19         | 2             | 1             | 3                       | 59          | 3     | 15.4    | carbidopa (200), levodopa (800)                                     | Normal                                                                                                                                        |
| VA007 | F   | 63          | R      | 21.78                        | 120          | 63              | 26         | 1             | 0             | 3                       | 45          | 3     | 11.6    | carbidopa (19); levodopa(75); rasagiline (0.5); trihexiphenydil (4) | Decreased sensation to pain and vibration in left arm, Muscle stretch reflect absent in right bicep                                           |
| VA008 | F   | 70          | R      | 6.16                         | 116          | 58              | 28         | 1             | 0             | 1                       | 41          | 2.5   | 9.0     | carbidopa (125), levodopa (500), rotigotine (8), rasagiline (1)     | Action tremor in hands bilaterally                                                                                                            |
| VA011 | M   | 72          | L      | 2.5                          | 179          | 74              | 28         | 1             | 0             | 1                       | 53          | 3     | 9.2     | carbidopa (850), levodopa (1150)                                    | CN II IV VI abnormal (mild lateral gaze paresis), CN VIII abnormal (decreased hearing to finger rubs on L), decreased vibration sense on R LE |
| VA014 | M   | 68          | R      | 9.08                         | 127          | 65              | 27         | 1             | 1             | 1                       | 28          | 3     | 7.4     | Carbidopa (??); levodopa (??); ropinerole (2); clonazepam (0.5);    | CN VII abnormal (R lower face does not elevate)                                                                                               |

|              |   |               |   |           |                 |               |               |              |           |           |                |              |              |                                                                                                                                                                       |                                                                                                                                                                                     |
|--------------|---|---------------|---|-----------|-----------------|---------------|---------------|--------------|-----------|-----------|----------------|--------------|--------------|-----------------------------------------------------------------------------------------------------------------------------------------------------------------------|-------------------------------------------------------------------------------------------------------------------------------------------------------------------------------------|
|              |   |               |   |           |                 |               |               |              |           |           |                |              |              | gabapentin (300)                                                                                                                                                      |                                                                                                                                                                                     |
| VA016        | M | 72            | L | 7.44      | 213             | 72            | 30            | 1            | 0         | 1         | 19             | 2            | 6.9          | carbidopa (200);<br>levodopa (800);<br>ropinirole (6);<br>selegiline (10)                                                                                             | CN 1 abnormal<br>(microsmia<br>diagnosed<br>2011)                                                                                                                                   |
| VA018        | F | 67            | R | 6.19      | 138             | 68            | 26            | 1            | 0         | 0         | 19             | 2            | 9.0          | carbidopa (100);<br>levodopa (400);<br>trihexyphenydyil (3)                                                                                                           | Normal                                                                                                                                                                              |
| VA023        | F | 74            | R | 3.68      | 124             | 62            | 29            | 2            | 0         | 1         | 41             | 3            | 11.9         | carbidopa (100);<br>levodopa (400);<br>selegiline (10);<br>pramipexole (1.125)                                                                                        | Poor sense of<br>smell (CNI); mild<br>reduced<br>vibration sense<br>lower limbs<br>bilaterally,<br>hypoactive<br>muscle stretch<br>reflexes upper<br>and lower limbs<br>bilaterally |
| VA026        | M | 52            | R | 0.79      | 230             | 75            | 24            | 1            | 0         | 0         | 34             | 2            | 9.1          | pramipexole (0.75);<br>rasagiline (1)                                                                                                                                 | mild terminal<br>tremor<br>(intention), heel-<br>to-shin R leg<br>abnormal)                                                                                                         |
| VA027        | F | 63            | L | 10.54     | 131             | 63            | 30            | 0            | 0         | 0         | 6              | 2            | 6.4          | Carbidopa (250);<br>levodopa (1000);<br>melatonin (5); aspirin<br>(81); fish oil (1);<br>estradiol (0.025);<br>rasagiline (1),<br>rotigotine (6),<br>entacapone (600) | No notes<br>available                                                                                                                                                               |
| VA032        | M | 84            | R | 7.36      | 168             | 70            | 26            | 2            | 1         | 1         | 31             | 3            | 15.7         | Carbidopa (25;<br>levodopa (100)                                                                                                                                      | CN I abnormal,<br>decreased<br>temp/vibration<br>sensitivity in<br>legs (R and L)                                                                                                   |
| Mean<br>(SD) |   | 68.3<br>(8.2) |   | 7.7 (5.3) | 159.9<br>(38.2) | 66.5<br>(5.1) | 26.5<br>(3.0) | 1.1<br>(0.6) | 0.2 (0.4) | 1.0 (1.0) | 33.5<br>(14.7) | 2.5<br>(0.5) | 9.9<br>(3.0) |                                                                                                                                                                       |                                                                                                                                                                                     |
